# Supplementary material for: The Effectiveness of Co-Inoculation by Consortia of Microorganisms Depends on the Type of Plant and the Soil Microbiome
Source: MDPI journal article supplement (doi:10.3390/plants13010116), 2023-12-31

## Supplementary Files

**Suppl. Table S1. Buckwheat's yield parameters of height**

NS – not significant

| Consortium | height of the plants<br>after 2 weeks, cm | height of the plants<br>after 4 weeks, cm | height of the plants<br>after 6 weeks, cm | p-value |
|------------|-------------------------------------------|-------------------------------------------|-------------------------------------------|---------|
| A          | 1,53 ± 0,06                               | 7,72 ± 2,44                               | 51,11 ± 13,21                             | NS      |
| B          | 1,40 ± 0,36                               | 7,67 ± 1,61                               | 58,67 ± 9,29                              | NS      |
| C          | 1,80 ± 0,28                               | 7,25 ± 0,82                               | 58,00 ± 4,24                              | 0.04    |
| D          | 1,67 ± 0,29                               | 7,06 ± 1,06                               | 49,56 ± 3,40                              | NS      |
| E          | 1,70 ± 0,44                               | 7,67 ± 0,76                               | 52,89 ± 6,11                              | NS      |
| F          | 1,63 ± 0,32                               | 8,06 ± 1,42                               | 58,56 ± 4,86                              | 0.04    |
| G          | 1,45 ± 0,21                               | 8,58 ± 0,12                               | 61,50 ± 4,01                              | 0.02    |
| H          | 1,10 ± 0,17                               | 6,72 ± 2,25                               | 51,11 ± 3,91                              | NS      |
| I          | 1,13 ± 0,23                               | 7,61 ± 1,55                               | 49,22 ± 6,99                              | NS      |
| J          | 1,10 ± 0,10                               | 6,06 ± 0,54                               | 52,89 ± 5,70                              | NS      |
| K          | 1,33 ± 0,21                               | 7,33 ± 1,01                               | 47,00 ± 3,28                              | NS      |
| L          | 1,47 ± 0,21                               | 6,61 ± 2,59                               | 51,67 ± 8,82                              | NS      |
| M          | 1,77 ± 0,40                               | 7,94 ± 1,49                               | 49,78 ± 13,04                             | NS      |
| N          | 1,70 ± 0,26                               | 7,89 ± 1,50                               | 58,44 ± 8,00                              | NS      |
| O          | 1,53 ± 0,47                               | 7,00 ± 2,49                               | 49,22 ± 11,36                             | NS      |
| P          | 1,17 ± 0,76                               | 6,89 ± 0,77                               | 49,11 ± 5,00                              | NS      |
| Q          | 1,13 ± 0,23                               | 7,89 ± 0,63                               | 48,44 ± 3,85                              | NS      |
| R          | 1,17 ± 0,25                               | 6,78 ± 1,54                               | 54,44 ± 2,69                              | NS      |
| S          | 1,77 ± 0,59                               | 7,89 ± 1,68                               | 51,44 ± 8,68                              | NS      |
| T          | 1,17 ± 0,59                               | 8,22 ± 0,69                               | 55,00 ± 8,09                              | NS      |
| Blank      | 1,33 ± 0,29                               | 6,56 ± 0,69                               | 47,00 ± 4,81                              | NS      |

**Suppl. Table S2. Buckwheat's yield parameters estimated by weight of grain, straw and roots**

| Consortium | mass of dry<br>straw, g | Mass of grain<br>weight, g<br>(mean ± SE) | average<br>weight of<br>grain from<br>the plot, g | Average<br>weight gain<br>from the plot<br>versus control,<br>% | mass of dry<br>roots, g | Mass of<br>dry roots<br>from the<br>plot versus<br>control, % |
|------------|-------------------------|-------------------------------------------|---------------------------------------------------|-----------------------------------------------------------------|-------------------------|---------------------------------------------------------------|
| A          | 6,18 ± 1,93             | 4,70 ± 0,79                               | 7,99                                              | 11,4                                                            | 2,50 ± 0,83             | -62,3                                                         |
| B          | 8,63 ± 1,36             | 4,11 ± 0,23                               | 6,74                                              | -6,0                                                            | 10,70 ± 3,57            | 61,1                                                          |
| C          | 10,13 ± 5,13            | 7,27 ± 0,75                               | 10,7                                              | 49,2 (p<0.05)                                                   | 16,72 ± 5,57            | 151,8                                                         |
| D          | 3,81 ± 0,39             | 3,07 ± 1,99                               | 5,38                                              | -25,0                                                           | 4,88 ± 1,63             | -26,5                                                         |
| E          | 5,65 ± 2,49             | 6,61 ± 3,29                               | 7,64                                              | 6,56                                                            | 5,92 ± 1,97             | -10,8                                                         |
| F          | 6,39 ± 2,66             | 6,51 ± 4,14                               | 7,88                                              | 9,9                                                             | 8,96 ± 2,99             | 34,9                                                          |
| G          | 8,33 ± 3,15             | 4,12 ± 2,26                               | 8,80                                              | -18,4                                                           | 7,78 ± 2,59             | 17,2                                                          |
| H          | 5,61 ± 0,82             | 6,43 ± 0,47                               | 7,05                                              | -1,7                                                            | 8,24 ± 2,75             | 24,1                                                          |
| I          | 5,23 ± 2,74             | 3,47 ± 2,06                               | 5,57                                              | -22,3                                                           | 6,40 ± 2,13             | -3,6                                                          |
| J          | 4,55 ± 1,25             | 4,64 ± 2,39                               | 5,53                                              | -22,9                                                           | 7,44 ± 2,48             | 12,0                                                          |
| K          | 5,27 ± 2,04             | 3,64 ± 0,53                               | 6,26                                              | -12,7                                                           | 10,02 ± 3,34            | 50,9                                                          |
| L          | 6,47 ± 5,32             | 6,55 ± 5,82                               | 8,05                                              | 12,3                                                            | 6,52 ± 2,17             | -1,8                                                          |
| M          | 6,97 ± 1,90             | 7,35 ± 3,25                               | 8,77                                              | 22,3                                                            | 9,10 ± 3,03             | 37,0                                                          |
| N          | 7,02 ± 1,09             | 6,22 ± 1,55                               | 7,36                                              | 2,6                                                             | 9,78 ± 3,26             | 47,3                                                          |
| O          | 5,27 ± 0,60             | 4,13 ± 1,52                               | 6,23                                              | -13,1                                                           | 9,92 ± 3,31             | 49,4                                                          |
| P          | 3,80 ± 3,32             | 2,03 ± 1,18                               | 3,12                                              | -56,5 (p<0.05)                                                  | 4,74 ± 1,58             | -28,6                                                         |
| Q          | 5,59 ± 1,40             | 5,48 ± 1,16                               | 6,06                                              | -15,4                                                           | 6,20 ± 2,07             | -6,6                                                          |
| R          | 6,47 ± 3,19             | 4,39 ± 2,00                               | 7,00                                              | -2,3                                                            | 10,06 ± 3,35            | 51,5                                                          |
| S          | 5,98 ± 2,38             | 6,05 ± 2,45                               | 6,76                                              | -5,7                                                            | 8,24 ± 2,75             | 24,1                                                          |

|       |             |             |      |         |             |         |
|-------|-------------|-------------|------|---------|-------------|---------|
| T     | 6,43 ± 0,81 | 3,13 ± 1,64 | 7,02 | -2,1    | 7,64 ± 2,55 | 15,1    |
| Blank | 6,05 ± 2,55 | 6,08 ± 2,16 | 7,17 | control | 6,64 ± 2,21 | control |

**Suppl. Table S3. Wheat's yield parameters of height**

One asterisk (\*) marks the level of statistical significance of the differences of 0.05 compared to the control plot (Blank).

| Consortium | height of the plants after 4 weeks, cm | height of the plants after 6 weeks, cm | Stem length (straw), cm | Ear length, cm | Stem/ear ratio |
|------------|----------------------------------------|----------------------------------------|-------------------------|----------------|----------------|
| A          | 6,4 ± 1,1                              | 30,3 ± 3,6                             | 67,0 ± 4,8*             | 4,3 ± 0,4      | 16             |
| B          | 6,1 ± 1,0                              | 28,9 ± 3,0                             | 52,3 ± 7,6              | 4,5 ± 0,9      | 12             |
| C          | 5,5 ± 0,4                              | 30,6 ± 4,0                             | 53,3 ± 6,5              | 3,6 ± 0,5      | 15             |
| D          | 5,8 ± 1,1                              | 30,9 ± 3,0                             | 52,1 ± 7,1              | 3,5 ± 0,8      | 15             |
| E          | 6,8 ± 2,2                              | 34,3 ± 6,3                             | 57,4 ± 6,0              | 4,5 ± 0,6      | 13             |
| F          | 6,3 ± 1,4                              | 29,8 ± 3,9                             | 52,6 ± 6,7              | 4,6 ± 0,9      | 11             |
| G          | 5,2 ± 0,9                              | 29,1 ± 3,5                             | 49,5 ± 5,1              | 3,3 ± 0,8      | 15             |
| H          | 5,4 ± 0,8                              | 30,0 ± 3,1                             | 56,8 ± 5,7              | 3,4 ± 0,2      | 17             |
| I          | 6,2 ± 1,1                              | 32,9 ± 3,1                             | 56,0 ± 6,9              | 4,1 ± 0,8      | 14             |
| J          | 6,4 ± 1,2                              | 31,1 ± 4,8                             | 53,3 ± 3,4              | 3,3 ± 0,1      | 16             |
| K          | 6,2 ± 0,7                              | 34,1 ± 5,0                             | 57,5 ± 7,0              | 3,9 ± 0,7      | 15             |
| L          | 6,6 ± 1,5                              | 29,0 ± 4,2                             | 58,4 ± 4,4              | 4,1 ± 0,4      | 14             |
| M          | 6,1 ± 1,0                              | 34,0 ± 3,9                             | 56,8 ± 6,9              | 4,8 ± 0,5      | 12             |
| N          | 6,2 ± 0,5                              | 30,9 ± 6,1                             | 57,1 ± 7,8              | 3,9 ± 1,2      | 15             |
| O          | 5,3 ± 0,4                              | 26,7 ± 3,9                             | 47,7 ± 2,8              | 3,0 ± 0,6      | 16             |
| P          | 7,3 ± 1,5                              | 33,4 ± 2,6                             | 57,4 ± 4,9              | 3,7 ± 0,2      | 15             |
| Q          | 5,8 ± 0,9                              | 31,2 ± 2,3                             | 63,2 ± 5,7              | 3,8 ± 0,8      | 17             |
| R          | 5,9 ± 1,6                              | 29,1 ± 4,4                             | 48,7 ± 2,8              | 4,1 ± 0,4      | 12             |
| S          | 6,3 ± 1,7                              | 32,4 ± 4,3                             | 57,5 ± 8,6              | 4,1 ± 0,3      | 14             |
| T          | 6,1 ± 0,6                              | 32,3 ± 6,0                             | 52,0 ± 2,7              | 3,8 ± 0,4      | 14             |
| Blank      | 5,6 ± 0,5                              | 30,4 ± 2,5                             | 55,1 ± 5,1              | 3,8 ± 0,8      | 15             |

**Suppl. Figure S1.** Wheat's height on 4 and 6 weeks.

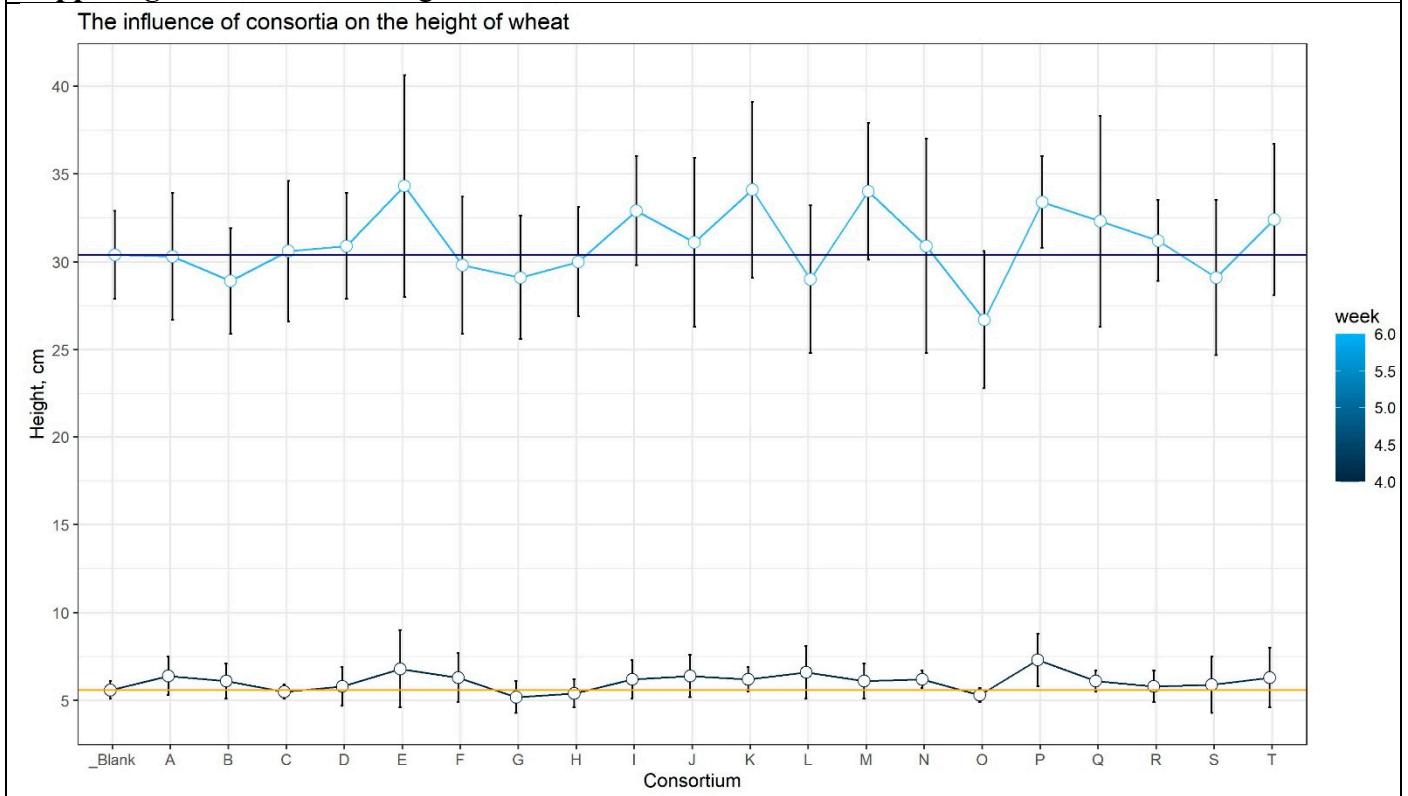

**Suppl. Figure S2.** Wheat's length of ear and steam of after 3 months.

The red line is corresponding on length of ear, the light blue one – of steam. Orange line corresponds the mean ear's length of control plants, the blue ones the mean and SD of steam's length. One asterisk (\*) marks the level of statistical significance of the differences of 0.05 compared to the control plot (Blank).

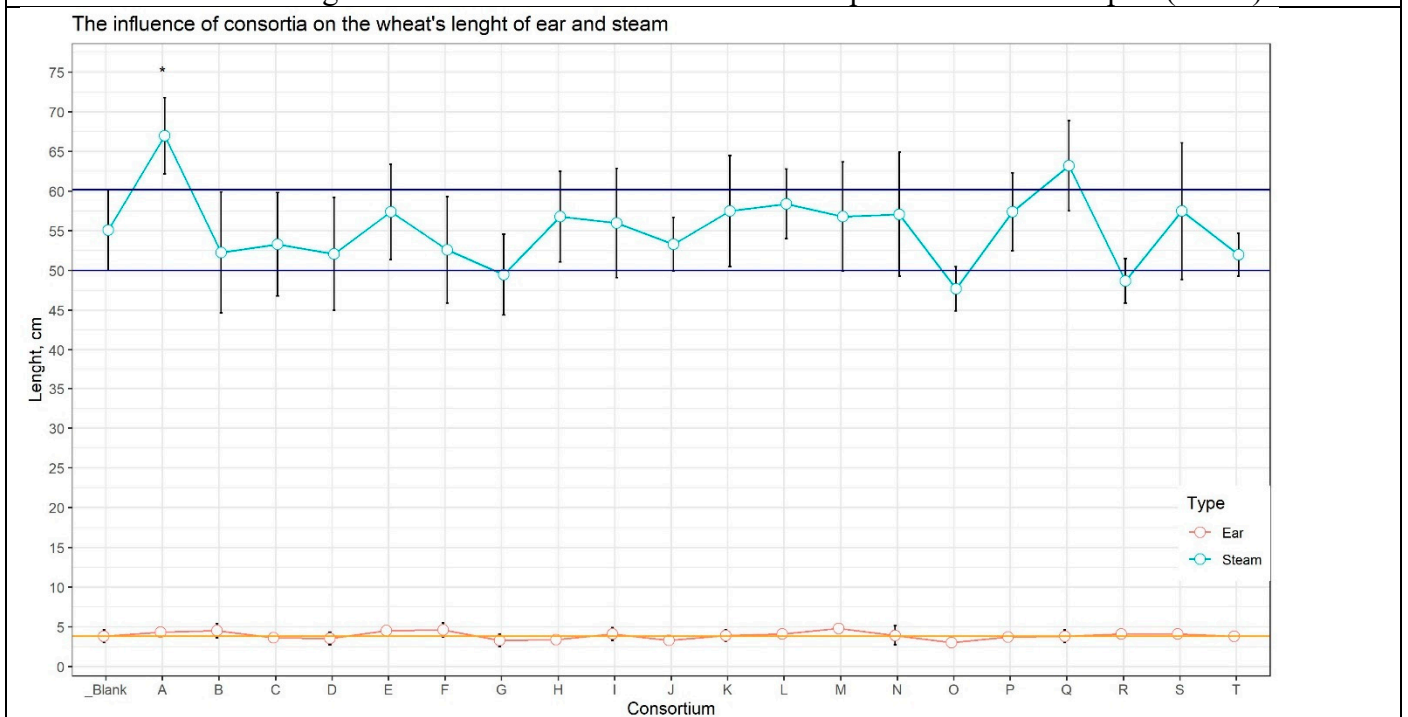

**Suppl. Figure S3. Weight of wheat's ear and grain**

The red line is corresponding on weight of wheat's ear, the blue points are the weight of grain without a floor.

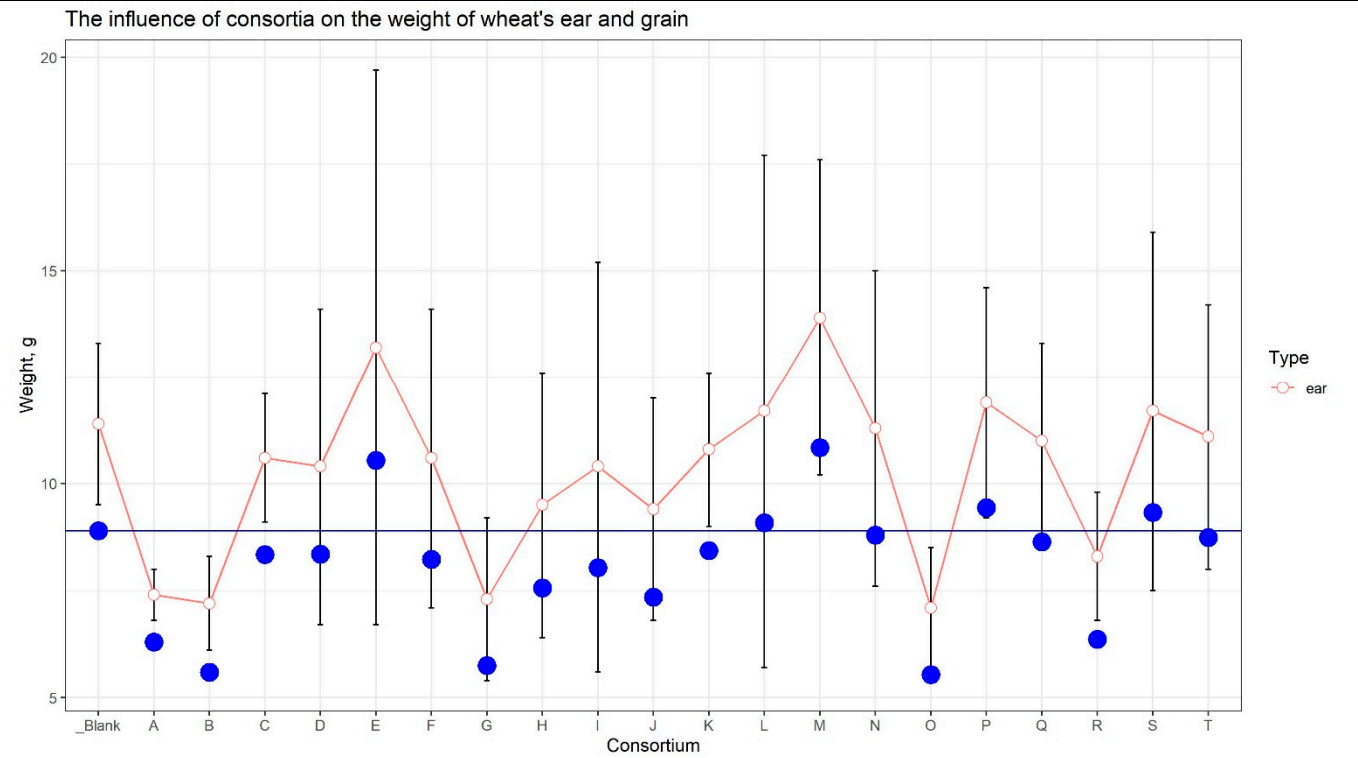**Suppl. Table S4. Corn's yield parameters**

| Consortium | height of the plants after 4 weeks, cm | height of the plants after 6 weeks, cm | Weight of wet ears of corn, g | Weight of dry ears of corn, g | Weight of dry roots of corn, g |
|------------|----------------------------------------|----------------------------------------|-------------------------------|-------------------------------|--------------------------------|
| A          | 9,7 ± 2,5                              | 31,6 ± 7,1                             | 236,7                         | 19,8                          | 551,7                          |
| B          | 8,9 ± 2,9                              | 32,1 ± 8,7                             | 295,0                         | 15,3                          | 481,1                          |
| C          | 9,8 ± 1,2                              | 32,1 ± 4,1                             | 376,7                         | 19,7                          | 577,2                          |
| D          | 9,8 ± 4,1                              | 30,6 ± 10,4                            | 223,3                         | 17,2                          | 387,4                          |
| E          | 10,8 ± 3,5                             | 33,1 ± 8,5                             | 520,0                         | 37,2                          | 690,9                          |
| F          | 8,8 ± 1,4                              | 26,8 ± 5,8                             | 221,7                         | 10,7                          | 412                            |
| G          | 10,6 ± 2,2                             | 27,2 ± 10,8                            | 315,0                         | 29,0                          | 421,9                          |
| H          | 10,5 ± 2,7                             | 30,3 ± 5,7                             | 411,7                         | 30,5                          | 564,1                          |
| I          | 10,0 ± 3,1                             | 36,9 ± 2,7                             | 420,0                         | 22,3                          | 524,4                          |
| J          | 8,5 ± 2,5                              | 27,5 ± 6,8                             | 325,0                         | 22,6                          | 620                            |
| K          | 10,3 ± 2,2                             | 27,3 ± 6,4                             | 301,7                         | 17,7                          | 555,6                          |
| L          | 11,4 ± 2,0                             | 37,4 ± 5,3                             | 366,7                         | 20,9                          | 505,1                          |
| M          | 8,1 ± 2,4                              | 27,3 ± 9,9                             | 348,3                         | 22,5                          | 387,4                          |
| N          | 8,3 ± 2,7                              | 23,1 ± 6,7                             | 181,7                         | 9,9                           | 292,8                          |
| O          | 10,4 ± 2,0                             | 29,1 ± 28,8                            | 173,3                         | 13,7                          | 421,2                          |
| P          | 9,7 ± 2,0                              | 28,8 ± 6,2                             | 338,3                         | 27,8                          | 492,2                          |
| Q          | 9,8 ± 3,4                              | 34,5 ± 7,4                             | 293,3                         | 15,2                          | 386,4                          |
| R          | 9,7 ± 2,1                              | 34,3 ± 5,7                             | 138,3                         | 18,6                          | 558,4                          |
| S          | 8,9 ± 2,0                              | 27,5 ± 8,0                             | 339,0                         | 7,2                           | 238,7                          |
| T          | 10,1 ± 1,6                             | 31,7 ± 7,1                             | 275,0                         | 15,9                          | 630,76                         |
| Blank      | 9,7 ± 2,7                              | 36,5 ± 6,0                             | 521,7                         | 30,2                          | 1133,5                         |

**Suppl. Figure S4.** Corn's height on 4 and 6 weeks.

The influence of consortia on the corn's height

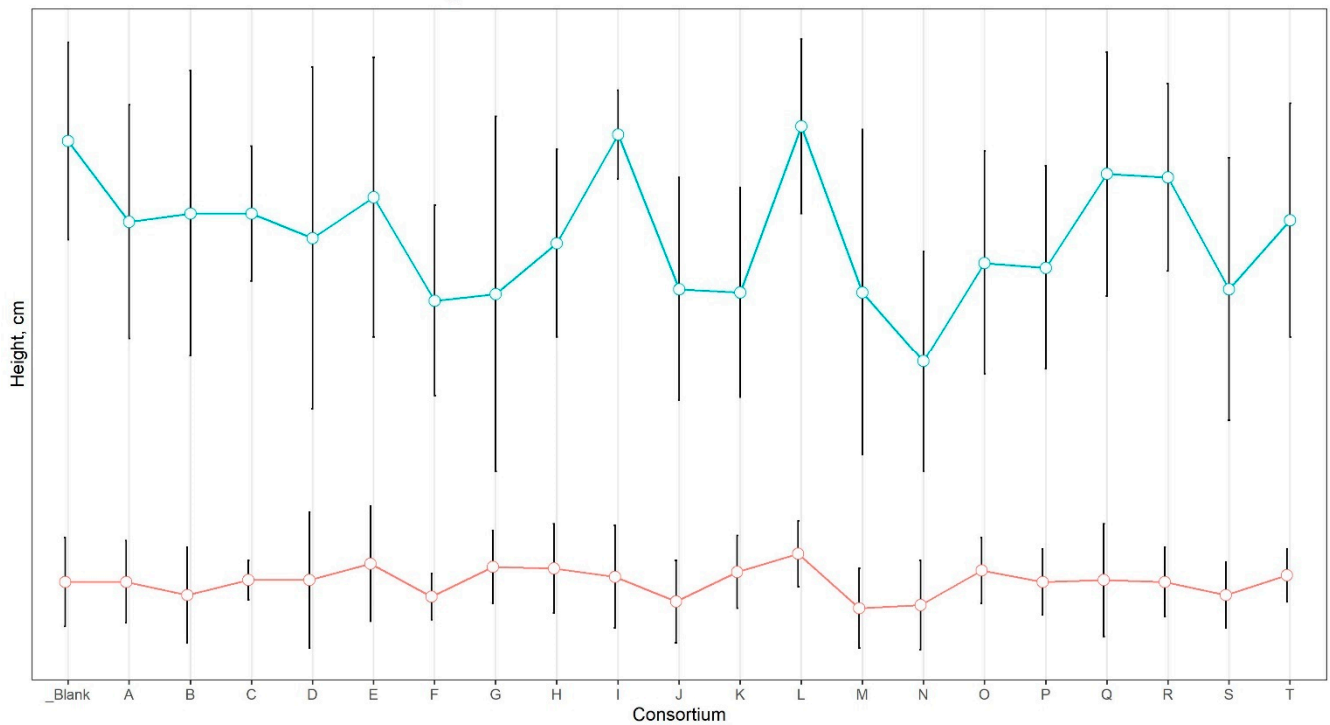

**Suppl. Figure S5.** Weight of corn's ears and roots

The red line is corresponding on weight of wheat's ear, the blue points are the weight of grain without a floor.

The influence of consortia on the corn's weight

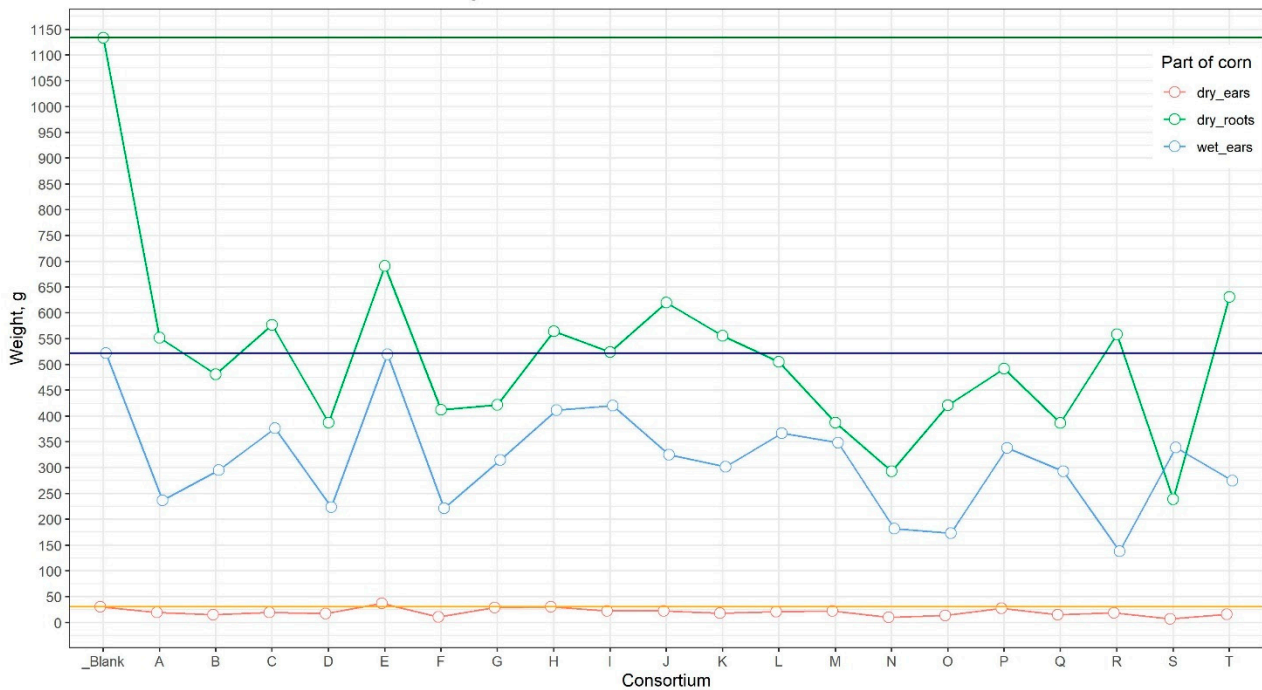

**Suppl. Table S5. Soil nutrient status**

SIC - soil inorganic carbon, SOC - soil organic carbon, AP - exchangeable potassium, Ex-K - exchangeable potassium, STC - soil total carbon

Two asterisk (\*\*) marks the level of statistical significance of the differences of 0.01 compared to the control plot (Soil).

| Cons     | AN-NH4      | AN-NO3      | AP             | Ex-K       | SOC  | SIC  | STC  |
|----------|-------------|-------------|----------------|------------|------|------|------|
| Buckweat |             |             |                |            |      |      |      |
| A        | 2,35 ± 0,35 | 4,60 ± 1,38 | 1,70 ± 0,01    | 184 ± 18,4 | 4,40 | 0,21 | 4,61 |
| B        | 1,99 ± 0,30 | 5,26 ± 1,58 | 2,14 ± 0,024   | 184 ± 18,4 | 4,66 | 0,18 | 4,84 |
| C        | 1,55 ± 0,23 | 4,81 ± 1,44 | 9,87 ± 0,019** | 166 ± 16,6 | 4,45 | 0,19 | 4,64 |
| D        | 1,12 ± 0,17 | 5,50 ± 1,65 | 1,43 ± 0,024   | 184 ± 18,4 | 4,81 | 0,21 | 5,02 |
| E        | 1,38 ± 0,21 | 4,40 ± 1,32 | 1,66 ± 0,029   | 184 ± 18,4 | 4,59 | 0,18 | 4,77 |
| F        | 1,17 ± 0,17 | 4,81 ± 1,44 | 1,68 ± 0,005   | 166 ± 16,6 | 4,69 | 0,17 | 4,87 |
| G        | 2,01 ± 0,30 | 5,03 ± 1,51 | 1,71 ± 0,010   | 184 ± 18,4 | 4,61 | 0,22 | 4,83 |
| H        | 4,69 ± 0,70 | 5,03 ± 1,51 | 1,59 ± 0,014   | 184 ± 18,4 | 4,41 | 0,20 | 4,61 |
| I        | 3,69 ± 0,55 | 4,81 ± 1,44 | 1,32 ± 0,010   | 166 ± 16,6 | 4,71 | 0,17 | 4,89 |
| J        | 4,58 ± 0,69 | 5,26 ± 1,58 | 1,23 ± 0,024   | 166 ± 16,6 | 4,34 | 0,20 | 4,54 |
| K        | 5,07 ± 0,76 | 5,26 ± 1,58 | 3,04 ± 0,00    | 166 ± 16,6 | 4,33 | 0,18 | 4,50 |
| L        | 2,46 ± 0,37 | 4,81 ± 1,44 | 1,59 ± 0,010   | 150 ± 15,0 | 4,51 | 0,19 | 4,70 |
| M        | 3,29 ± 0,49 | 4,81 ± 1,44 | 1,63 ± 0,005   | 166 ± 16,6 | 4,37 | 0,19 | 4,57 |
| N        | 3,75 ± 0,56 | 4,81 ± 1,44 | 1,76 ± 0,010   | 166 ± 16,6 | 4,61 | 0,19 | 4,81 |
| O        | 2,31 ± 0,35 | 4,21 ± 1,26 | 1,18 ± 0,029   | 150 ± 15,0 | 4,69 | 0,20 | 4,89 |
| P        | 1,57 ± 0,24 | 4,40 ± 1,32 | 1,52 ± 0,00    | 166 ± 16,6 | 4,37 | 0,19 | 4,57 |
| R        | 2,16 ± 0,32 | 4,40 ± 1,32 | 1,58 ± 0,014   | 150 ± 15,0 | 4,34 | 0,22 | 4,56 |
| S        | 2,40 ± 0,36 | 4,40 ± 1,32 | 1,56 ± 0,014   | 166 ± 16,6 | 4,54 | 0,20 | 4,73 |
| T        | 1,95 ± 0,29 | 4,21 ± 1,26 | 1,22 ± 0,010   | 150 ± 15,0 | 4,77 | 0,20 | 4,97 |
| Q        | 2,16 ± 0,32 | 4,60 ± 1,38 | 1,51 ± 0,010   | 184 ± 18,4 | 4,71 | 0,18 | 4,89 |
| Blank    | 5,30 ± 0,80 | 5,26 ± 1,58 | 1,91 ± 0,000   | 184 ± 18,4 | 4,66 | 0,19 | 4,85 |
| Soil     | 3,51 ± 0,53 | 4,03 ± 1,21 | 1,01 ± 0,024   | 134 ± 13,4 | 4,68 | 0,22 | 4,91 |
| Wheat    |             |             |                |            |      |      |      |
| A        | 1,99 ± 0,30 | 6,05 ± 1,82 | 0,82 ± 0,009   | 165 ± 16,5 | 4,89 | 0,18 | 5,07 |
| B        | 2,06 ± 0,31 | 5,02 ± 1,51 | 0,64 ± 0,014   | 175 ± 17,5 | 4,86 | 0,19 | 5,06 |
| C        | 2,57 ± 0,38 | 4,57 ± 1,37 | 1,01 ± 0,005   | 170 ± 17,0 | 4,64 | 0,18 | 4,82 |
| D        | 1,93 ± 0,29 | 4,16 ± 1,25 | 0,62 ± 0,019   | 160 ± 16,0 | 4,41 | 0,18 | 4,58 |
| E        | 2,44 ± 0,37 | 5,02 ± 1,51 | 0,86 ± 0,014   | 175 ± 17,5 | 4,67 | 0,17 | 4,84 |
| F        | 2,99 ± 0,45 | 3,97 ± 1,19 | 0,72 ± 0,024   | 155 ± 15,5 | 4,12 | 0,18 | 4,30 |
| G        | 0,95 ± 0,14 | 3,97 ± 1,19 | 0,59 ± 0,00    | 160 ± 16,0 | 4,00 | 0,20 | 4,21 |
| H        | 1,44 ± 0,22 | 4,57 ± 1,37 | 1,05 ± 0,005   | 180 ± 18,0 | 4,74 | 0,19 | 4,93 |
| I        | 0,64 ± 0,10 | 4,36 ± 1,31 | 0,69 ± 0,019   | 170 ± 17,0 | 4,66 | 0,18 | 4,84 |
| J        | 0,72 ± 0,11 | 4,36 ± 1,31 | 0,58 ± 0,009   | 160 ± 16,0 | 4,17 | 0,17 | 4,34 |
| K        | 1,84 ± 0,28 | 3,97 ± 1,19 | 0,72 ± 0,024   | 175 ± 17,5 | 4,67 | 0,18 | 4,85 |
| L        | 0,64 ± 0,10 | 4,79 ± 1,44 | 1,03 ± 0,024   | 206 ± 20,6 | 4,61 | 0,18 | 4,79 |
| M        | 1,55 ± 0,23 | 3,79 ± 1,14 | 0,63 ± 0,019   | 165 ± 16,5 | 4,55 | 0,19 | 4,74 |
| N        | 0,98 ± 0,15 | 4,16 ± 1,25 | 0,88 ± 0,005   | 165 ± 16,5 | 4,16 | 0,25 | 4,41 |
| O        | 1,27 ± 0,19 | 3,97 ± 1,19 | 1,00 ± 0,009   | 175 ± 17,5 | 4,70 | 0,17 | 4,87 |
| P        | 4,85 ± 0,73 | 3,97 ± 1,19 | 1,21 ± 0,00    | 175 ± 17,5 | 4,64 | 0,19 | 4,82 |
| Q        | 2,12 ± 0,32 | 3,97 ± 1,19 | 0,72 ± 0,005   | 165 ± 16,5 | 4,63 | 0,20 | 4,83 |
| R        | 1,97 ± 0,30 | 3,97 ± 1,19 | 0,69 ± 0,019   | 180 ± 18,0 | 4,50 | 0,18 | 4,68 |
| S        | 1,34 ± 0,20 | 3,62 ± 1,09 | 0,80 ± 0,024   | 180 ± 18,0 | 4,09 | 0,20 | 4,29 |

|       |             |             |              |            |      |      |      |
|-------|-------------|-------------|--------------|------------|------|------|------|
| T     | 3,18 ± 0,48 | 4,16 ± 1,25 | 0,75 ± 0,024 | 165 ± 16,5 | 4,07 | 0,16 | 4,23 |
| Blank | 2,12 ± 0,32 | 3,97 ± 1,19 | 1,11 ± 0,009 | 165 ± 16,5 | 4,52 | 0,17 | 4,69 |
| Soil  | 3,40 ± 0,51 | 3,97 ± 1,19 | 0,65 ± 0,009 | 150 ± 15,0 | 3,96 | 0,17 | 4,13 |
| Corn  |             |             |              |            |      |      |      |
| A     | 0,95 ± 0,14 | 6,34 ± 1,90 | 0,40 ± 0,009 | 112 ± 11,2 | 2,11 | 0,13 | 2,24 |
| B     | 1,44 ± 0,22 | 7,30 ± 2,19 | 0,28 ± 0,014 | 120 ± 12,0 | 3,22 | 0,15 | 3,37 |
| C     | 0,76 ± 0,11 | 6,65 ± 1,99 | 0,28 ± 0,005 | 124 ± 12,4 | 3,03 | 0,14 | 3,17 |
| D     | 0,21 ± 0,03 | 5,02 ± 1,51 | 0,21 ± 0,024 | 137 ± 13,7 | 2,97 | 0,14 | 3,11 |
| E     | 1,34 ± 0,20 | 6,34 ± 1,90 | 0,25 ± 0,005 | 124 ± 12,4 | 3,24 | 0,16 | 3,40 |
| F     | 0,83 ± 0,12 | 5,78 ± 1,73 | 0,35 ± 0,009 | 116 ± 11,6 | 3,13 | 0,15 | 3,28 |
| G     | 1,78 ± 0,27 | 5,51 ± 1,65 | 0,25 ± 0,014 | 108 ± 10,8 | 2,57 | 0,14 | 2,72 |
| H     | 1,51 ± 0,23 | 5,02 ± 1,51 | 0,32 ± 0,014 | 112 ± 11,2 | 2,41 | 0,16 | 2,58 |
| I     | 1,06 ± 0,16 | 5,78 ± 1,73 | 0,29 ± 0,009 | 165 ± 16,2 | 2,97 | 0,17 | 3,14 |
| J     | 0,66 ± 0,10 | 5,78 ± 1,73 | 0,31 ± 0,005 | 120 ± 12,0 | 2,82 | 0,30 | 3,12 |
| K     | 1,34 ± 0,20 | 6,05 ± 1,82 | 0,37 ± 0,000 | 96 ± 48,0  | 2,69 | 0,13 | 2,82 |
| L     | 1,97 ± 0,30 | 4,79 ± 1,44 | 0,23 ± 0,009 | 137 ± 13,7 | 2,80 | 0,17 | 2,97 |
| M     | 1,95 ± 0,29 | 4,79 ± 1,44 | 0,25 ± 0,009 | 100 ± 10,0 | 2,51 | 0,12 | 2,63 |
| N     | 2,14 ± 0,32 | 4,57 ± 1,37 | 0,38 ± 0,014 | 87 ± 13,1  | 2,96 | 0,15 | 3,11 |
| O     | 1,19 ± 0,18 | 4,79 ± 1,44 | 0,27 ± 0,009 | 129 ± 12,9 | 2,32 | 0,11 | 2,43 |
| P     | 1,51 ± 0,23 | 5,02 ± 1,51 | 0,31 ± 0,024 | 150 ± 15,0 | 3,12 | 0,14 | 3,27 |
| R     | 1,25 ± 0,19 | 4,16 ± 1,25 | 0,27 ± 0,000 | 124 ± 12,4 | 2,61 | 0,14 | 2,75 |
| S     | 0,28 ± 0,04 | 5,78 ± 1,73 | 0,28 ± 0,005 | 120 ± 12,0 | 2,81 | 0,14 | 2,95 |
| T     | 0,81 ± 0,12 | 4,36 ± 1,31 | 0,34 ± 0,014 | 146 ± 14,6 | 3,10 | 0,18 | 3,28 |
| Q     | 0,91 ± 0,14 | 4,79 ± 1,44 | 0,25 ± 0,019 | 146 ± 14,6 | 3,43 | 0,17 | 3,60 |
| Blank | 1,51 ± 0,23 | 5,02 ± 1,51 | 0,36 ± 0,005 | 116 ± 11,6 | 2,88 | 0,14 | 3,03 |
| Soil  | 1,38 ± 0,21 | 6,05 ± 1,82 | 0,37 ± 0,000 | 108 ± 10,8 | 2,95 | 0,14 | 3,10 |

**Suppl. Figure S6.** Dependence of detection of the number of taxa (OTUs) on the number of sequences (N). The dependence of the detection of the number of taxa (OTU) on the number of sequences (N). The x-axis shows the number of sequences, the ordinate axis shows the observed species (OTU). The curves on the graph correspond to all the soil samples studied. As the sequencing depth increased, so did the number of OTU. After 700 sequences, the curves for all samples reached a plateau, indicating that as the number of extracted sequences increased, the number of detectable OTU no longer increased.

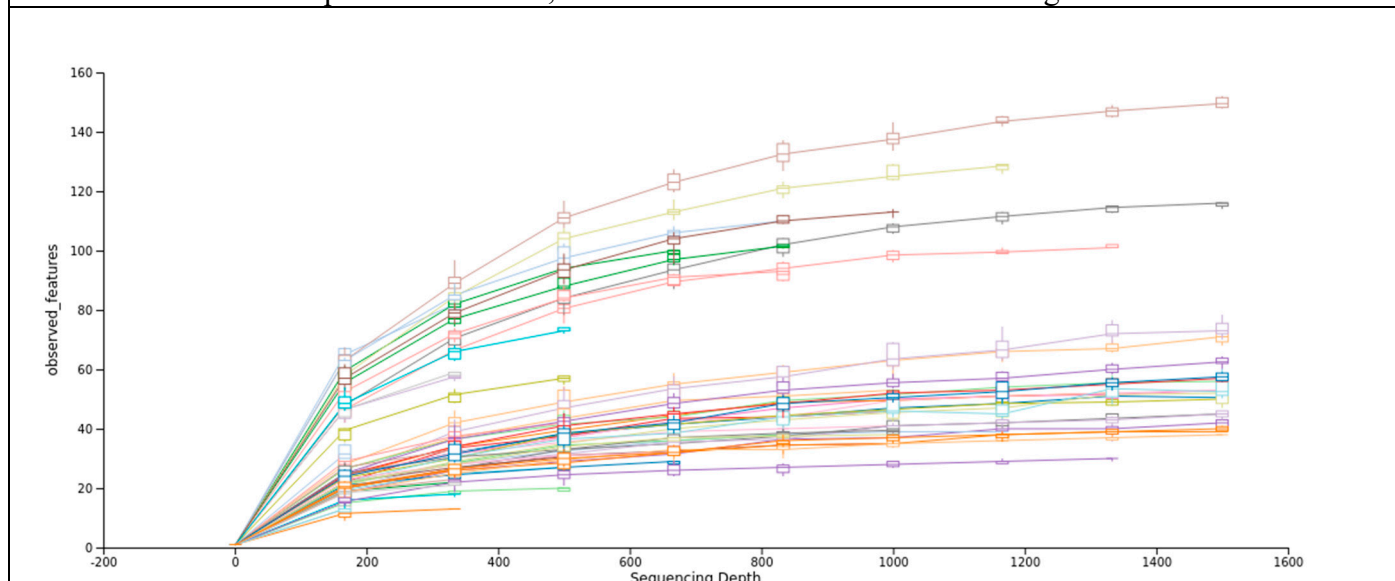

**Suppl. Table S6.** Statistical table of  $\alpha$ -diversity index under different consortium on wheat, corn and гречихи.

| Consortsium | Obs             | Chao1           | ACE             | Shannon         |
|-------------|-----------------|-----------------|-----------------|-----------------|
| A           | 40,5 $\pm$ 38,9 | 62,2 $\pm$ 49,4 | 61,5 $\pm$ 48,2 | 2,51 $\pm$ 1,50 |
| B           | 42,3 $\pm$ 28,4 | 65,5 $\pm$ 46,2 | 67,8 $\pm$ 49,2 | 2,64 $\pm$ 0,97 |
| C           | 34 $\pm$ 13,5   | 56,5 $\pm$ 31,5 | 79,5 $\pm$ 51,6 | 2,30 $\pm$ 0,51 |
| D           | 38,3 $\pm$ 25,7 | 63,3 $\pm$ 47,1 | 71,9 $\pm$ 53,6 | 2,43 $\pm$ 0,75 |
| E           | 31,7 $\pm$ 25,8 | 58,2 $\pm$ 63,9 | 58,2 $\pm$ 62,9 | 2,27 $\pm$ 0,67 |
| F           | 40,7 $\pm$ 23,0 | 64,1 $\pm$ 51,9 | 72,9 $\pm$ 61,6 | 2,50 $\pm$ 0,69 |
| G           | 25,7 $\pm$ 3,8  | 32,0 $\pm$ 9,8  | 35,4 $\pm$ 11,9 | 2,12 $\pm$ 0,16 |
| H           | 23,7 $\pm$ 4,0  | 29,8 $\pm$ 8,7  | 58,3 $\pm$ 7,7  | 2,11 $\pm$ 0,12 |
| I           | 31,7 $\pm$ 6,0  | 50,1 $\pm$ 7,0  | 61,8 $\pm$ 12,3 | 2,23 $\pm$ 0,46 |
| J           | 35,0 $\pm$ 11,1 | 53,6 $\pm$ 7,9  | 30,9 $\pm$ 11,4 | 2,39 $\pm$ 0,46 |
| K           | 23,0 $\pm$ 5,7  | 29,0 $\pm$ 12,8 | 44,0 $\pm$ 21,1 | 2,03 $\pm$ 0,04 |
| L           | 32,0 $\pm$ 15,9 | 40,0 $\pm$ 18,7 | 29,7 $\pm$ 11,6 | 2,36 $\pm$ 0,70 |
| M           | 21,5 $\pm$ 3,54 | 26,4 $\pm$ 9,3  | 63,8 $\pm$ 51,5 | 1,95 $\pm$ 0,06 |
| N           | 43,5 $\pm$ 34,6 | 54,6 $\pm$ 44,4 | 57,1 $\pm$ 40,7 | 2,72 $\pm$ 1,28 |
| O           | 35,7 $\pm$ 22,0 | 53,1 $\pm$ 42,6 | 57,1 $\pm$ 40,7 | 2,31 $\pm$ 0,93 |
| P           | 34,0 $\pm$ 20,2 | 52,9 $\pm$ 35,6 | 59,1 $\pm$ 38,2 | 2,36 $\pm$ 0,73 |
| Q           | 36,3 $\pm$ 17,9 | 66,8 $\pm$ 40,4 | 70,9 $\pm$ 44,3 | 2,42 $\pm$ 0,56 |
| S           | 21,0 $\pm$ 5,7  | 32,1 $\pm$ 21,0 | 29,8 $\pm$ 16,3 | 1,92 $\pm$ 0,06 |
| T           | 25,7 $\pm$ 4,5  | 36,7 $\pm$ 13,7 | 39,6 $\pm$ 13,7 | 2,18 $\pm$ 0,24 |
| Soil        | 27,3 $\pm$ 16,9 | 34,3 $\pm$ 28,7 | 36,5 $\pm$ 32,2 | 2,28 $\pm$ 0,74 |
| Blank       | 31,0 $\pm$ 12,7 | 45,0 $\pm$ 12,7 | 57,1 $\pm$ 9,6  | 2,25 $\pm$ 0,18 |
| Plant       | Obs             | Chao1           | ACE             | Shannon         |
| bw          | 27,5 $\pm$ 9,1  | 41,9 $\pm$ 19,6 | 48,9 $\pm$ 27,1 | 2,18 $\pm$ 0,37 |
| corn        | 46 $\pm$ 18,8   | 73,1 $\pm$ 37,8 | 80,3 $\pm$ 39,4 | 2,78 $\pm$ 0,64 |
| wheat       | 22,85 $\pm$ 6,5 | 30,8 $\pm$ 12,8 | 33,1 $\pm$ 13,8 | 1,98 $\pm$ 0,26 |

**Suppl. Figure S7.** Box plot of indices of alpha diversity of microorganisms in soil plots. From A to T — different types of consortia. Blank is a soil sample on which seeds not inoculated with microorganisms grew. Soil - a soil sample on which the tested plant culture did not grow



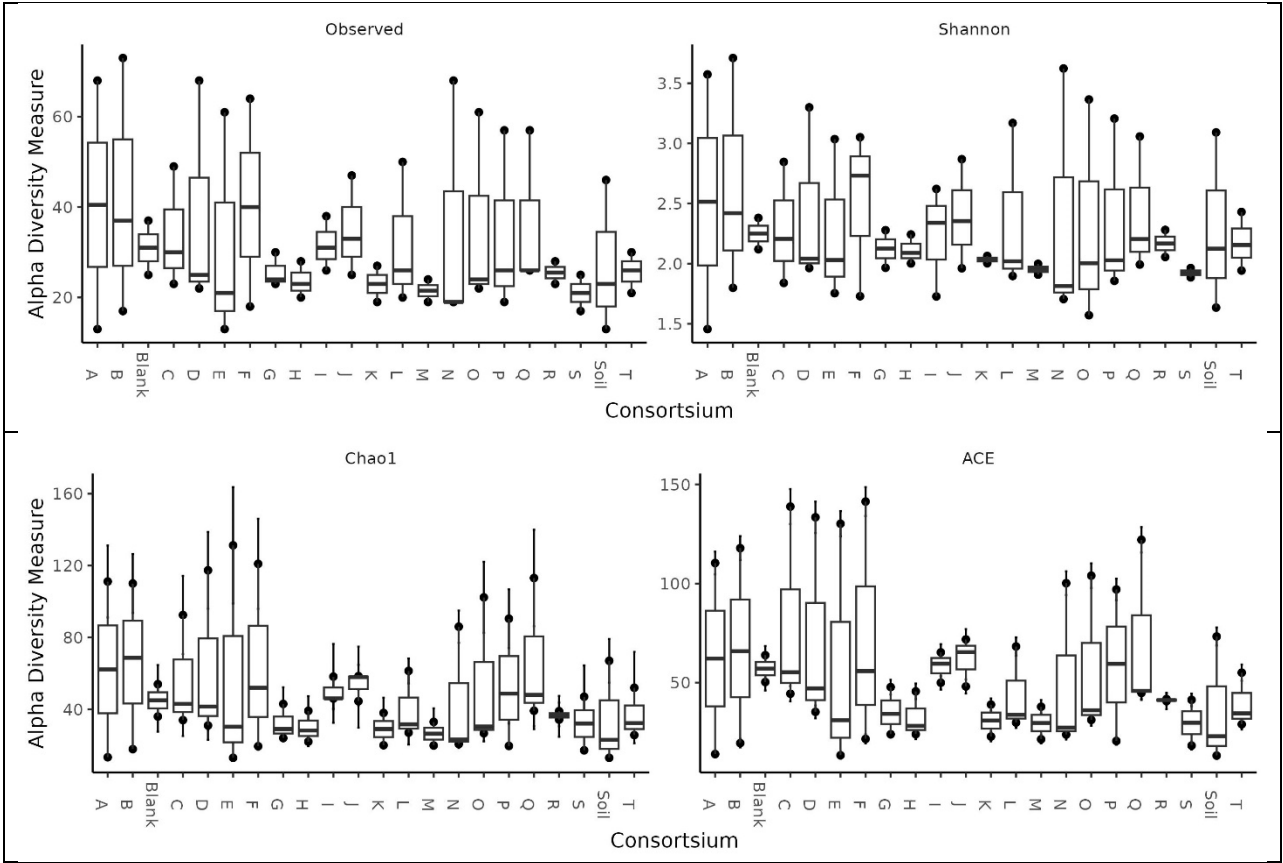

Supplement: s1 [file s1]
